# Supplementary material for: ACAP1 Deficiency Predicts Inferior Immunotherapy Response in Solid Tumors
Source: MDPI journal article supplement (doi:10.3390/cancers14235951), 2022-12-01
Supplement: s1 [file s1]

## Supplementary Material:

**Table S1. Abbreviation**

| <b>TCGA cancer types abbreviations</b> |                                                                  |
|----------------------------------------|------------------------------------------------------------------|
| <b>Abbreviation</b>                    | <b>Full name</b>                                                 |
| ACC                                    | Adrenocortical carcinoma                                         |
| BLCA                                   | Bladder Urothelial Carcinoma                                     |
| BRCA                                   | Breast invasive carcinoma                                        |
| CESC                                   | Cervical squamous cell carcinoma and endocervical adenocarcinoma |
| CHOL                                   | Cholangiocarcinoma                                               |
| COAD                                   | Colon adenocarcinoma                                             |
| DLBC                                   | Lymphoid Neoplasm Diffuse Large B-cell Lymphoma                  |
| ESCA                                   | Esophageal carcinoma                                             |
| GBM                                    | Glioblastoma multiforme                                          |
| HNSC                                   | Head and Neck squamous cell carcinoma                            |
| KICH                                   | Kidney Chromophobe                                               |
| KIRC                                   | Kidney renal clear cell carcinoma                                |
| KIRP                                   | Kidney renal papillary cell carcinoma                            |
| LAML                                   | Acute Myeloid Leukemia                                           |
| LGG                                    | Brain Lower Grade Glioma                                         |
| LIHC                                   | Liver hepatocellular carcinoma                                   |
| LUAD                                   | Lung adenocarcinoma                                              |
| LUSC                                   | Lung squamous cell carcinoma                                     |
| MESO                                   | Mesothelioma                                                     |
| OV                                     | Ovarian serous cystadenocarcinoma                                |
| PAAD                                   | Pancreatic adenocarcinoma                                        |
| PCPG                                   | Pheochromocytoma and Paraganglioma                               |
| PRAD                                   | Prostate adenocarcinoma                                          |
| READ                                   | Rectum adenocarcinoma                                            |
| SARC                                   | Sarcoma                                                          |
| SKCM                                   | Skin Cutaneous Melanoma                                          |
| STAD                                   | Stomach adenocarcinoma                                           |
| TGCT                                   | Testicular Germ Cell Tumors                                      |
| THCA                                   | Thyroid carcinoma                                                |
| THYM                                   | Thymoma                                                          |
| UCEC                                   | Uterine Corpus Endometrial Carcinoma                             |
| UCS                                    | Uterine Carcinosarcoma                                           |
| UVM                                    | Uveal Melanoma                                                   |
|                                        |                                                                  |
| <b>Other abbreviations</b>             |                                                                  |

| Abbreviation     | Full name                                                |
|------------------|----------------------------------------------------------|
| ACAP1            | ArfGAP With Coiled-Coil, Ankyrin Repeat And PH Domains 1 |
| AUC              | Area under the ROC curve                                 |
| ccRCC            | Clear cell renal cell carcinoma                          |
| RCC              | Renal cell carcinoma                                     |
| CGGA             | Chinese Glioma Genome Atlas                              |
| CENTB1           | Centaurin beta1                                          |
| CNV              | Copy Number Variation                                    |
| CNA              | Copy Number Alteration                                   |
| CPTAC            | Clinical Proteomic Tumor Analysis Consortium             |
| CYT              | Cytotoxicity score                                       |
| DFI              | Disease-Free Interval                                    |
| DSS              | Disease-Specific Survival                                |
| GEO              | Gene Expression Omnibus                                  |
| GTE <sub>x</sub> | Genotype-Tissue Expression Project                       |
| HCC              | Hepatocellular carcinoma                                 |
| ICGC             | International Cancer Genome Consortium                   |
| ICT              | Immune checkpoint blockade therapy                       |
| MDSC             | Myeloid derived suppressor cell                          |
| MSI              | Microsatellite Instability                               |
| mUC              | metastatic urothelial cancer                             |
| NSCLC            | Non-Small Cell Lung Cancer                               |
| OS               | Overall Survival                                         |
| PFI              | Progression-Free Interval                                |
| PFS              | Progression-Free Survival                                |
| ROC              | Receiver Operating Characteristic                        |
| RPKM             | Reads per kilo base per million mapped reads             |
| TCGA             | The Cancer Genome Atlas                                  |
| TIDE             | Tumor Immune Dysfunction and Exclusion                   |
| TILs             | Tumor-infiltrating lymphocytes                           |
| TMB              | Tumor Mutational Burden                                  |
| TPM              | Transcripts Per Million                                  |
| tSNE             | t-distributed stochastic neighbor embedding              |

## Supplementary figure legends:

**Figure S1.** ACAP1 expression levels in mouse tissues and cell lines were visualized by BioGPS.

**Figure S2.** Stacked bar graphs illustrate the proportion of cells with different ACAP1 levels in various cell types in the GSE72096 and GSE115978 datasets, respectively.

**Figure S3.** The ACAP1 expression across different cell types in single-cell sequencing datasets was represented as violin plots, respectively.

**Figure S4.** Differential expression of ACAP1 in different T stages across TCGA tumor types.

**Figure S5.** Differential expression of ACAP1 in different N stages across TCGA tumor types.

**Figure S6.** Differential expression of ACAP1 in different M stages across TCGA tumor types.

**Figure S7.** Differential expression of ACAP1 in different pathologic or clinical stages across TCGA tumor types.

**Figure S8.** Disease-specific survival analyses of cancer patients stratified by ACAP1 mRNA level with Kaplan-Meier method in TCGA datasets.

**Figure S9.** Progression-free interval analyses of cancer patients stratified by ACAP1 mRNA level with Kaplan-Meier method in TCGA datasets.

**Figure S10. Genomic alterations of ACAP1 across TCGA cancer types.** The prevalence of ACAP1 genomic aberrations across cancer types in TCGA. CNA , copy number alteration.

**Figure S11. GSEA analyses of the co-expressed genes of ACAP1 across 33 cancer types in TCGA.** The top five significant “biological processes” correlated with ACAP1 expression were plotted for each cancer type.

**Figure S12.** The spearman correlation of ACAP1 expression with infiltration level of dendritic cell, monocyte, macrophage, mast cell, neutrophil, eosinophil, Granulocyte-monocyte progenitor, Common myeloid progenitor, and Common lymphoid progenitor using the TIMER2 web tool.

**Figure S13. The Spearman correlations of ACAP1 expression and immune-related gene expression across 33 cancer types in TCGA.** (A) Correlation of ACAP1 expression with cytotoxic genes (GZMA and PRF1) expression and cytotoxicity score (CYT). (B) The correlation of ACAP1 expression with MHC gene expression.

**Figure S14.** Pan-cancer analysis of the correlation between ACAP1 expression and TMB (A) or MSI (B) across 33 cancer types in TCGA.
