# Supplementary material for: ACAP1 Deficiency Predicts Inferior Immunotherapy Response in Solid Tumors
Source: Cancers (Basel). 2022 Dec 1;14(23):5951. doi: 10.3390/cancers14235951 (PMC9740925; doi:10.3390/cancers14235951)
Supplement: Supplementary file 1 [file cancers-14-05951-s001.zip]

Archive with 17 entries (17 files):
- Figure S1.tif
- Figure S10.tif
- Figure S11.tif
- Figure S12.tif
- Figure S13.tif
- Figure S14.tif
- Figure S15. original WB images.pdf
- Figure S2.tif
- Figure S3.tif
- Figure S4.tif
- Figure S5.tif
- Figure S6.tif
- Figure S7.tif
- Figure S8.tif
- Figure S9.tif
- Supplementary figure legends and table S1.pdf
- Table S2. Genes involved in the main associated pathways in GSEA.xlsx
