# Supplementary material for: ACAP1 Deficiency Predicts Inferior Immunotherapy Response in Solid Tumors
Source: Cancers (Basel). 2022 Dec 1;14(23):5951. doi: 10.3390/cancers14235951 (PMC9740925; doi:10.3390/cancers14235951)
Supplement: Supplementary file 1 [file cancers-14-05951-s001.zip › Table S2. Genes involved in the main associated pathways in GSEA.xlsx]

## Sheet: Sheet1
GOBP_pathway
GOBP_ADAPTIVE_IMMUNE_RESPONSE_BASED_ON_SOMATIC_RECOMBINATION_OF_IMMUNE_RECEPTORS_BUILT_FROM_IMMUNOGLOBULIN_SUPERFAMILY_DOMAINS	ADA	C17orf99	PARP3	IGLL5	MICA	IL18BP	EBI3	IGHV2-70D	IGHV1-69D	IGHV3-64D	TCIRG1	BTN3A3	MAD2L2	BATF	CXCL13	CD226	TNFSF13B	MASP2	CTSC	TRAF3IP2	LILRB1	ARID5A	MALT1	LILRB4	RIPK3	BTN3A2	SHLD3	TREX1	NLRP3	CSMD3	SLAMF6	CLC	EXOSC6	CLU	SLC15A4	CCR6	CR1	CR1L	CR2	CSF2RB	RC3H1	IL23R	SHLD1	CTSH	CD55	DENND1B	RNF168	AGER	JAG1
GOBP_ALPHA_BETA_T_CELL_PROLIFERATION	EBI3	CD55	DOCK2	ELF4	PTPN22	LGALS9B	CD274	HLA-A	HLA-E	CLEC4G	IL2	IL2RA	IL12B	IL15	IL18	IRF1	JAK2	ARG2	LGALS9	FOXP3	ZBTB7B	IL23A	PRKCQ	TWSG1	SH3RF1	PTPRC	XCL1	VSIR	RASAL3	LGALS7B	LGALS9C	SYK	TGFBR2	TNFSF4	CCR2	TYK2	ZAP70	NDFIP1	ITCH	CARD11	CBLB	TNFRSF14	RIPK2	CD3E	CD28	MAPK8IP1	CD81
GOBP_ANTIGEN_PROCESSING_AND_PRESENTATION_OF_EXOGENOUS_PEPTIDE_ANTIGEN_VIA_MHC_CLASS_II	IFI30	CTSD	CTSE	CTSL	CTSV	CTSS	DNM2	PIKFYVE	FCER1G	FCGR2B	HLA-DMA	HLA-DMB	HLA-DOA	HLA-DOB	HLA-DPA1	HLA-DPB1	HLA-DQA1	HLA-DQA2	HLA-DQB1	HLA-DQB2	HLA-DRA	HLA-DRB1	HLA-DRB3	HLA-DRB4	HLA-DRB5	LGMN	B2M	TRAF6	CTSF	CD74
GOBP_B_CELL_MEDIATED_IMMUNITY	C17orf99	PARP3	IGLL5	IGHV2-70D	IGHV1-69D	IGHV3-64D	TCIRG1	MAD2L2	BATF	CD226	MASP2	TRAF3IP2	SHLD3	TREX1	CSMD3	EXOSC6	CLU	SLC15A4	CCR6	CR1	CR1L	CR2	CSF2RB	SHLD1	CD55	RNF168	APLF	GAPT	ERCC1	FCER1G	FCER2	FCGR1A	FCGR2B	FCGR3A	PAXIP1	FOXJ1	SWAP70	CLCF1	IGHV7-81	IGHV6-1	IGHV5-10-1	IGHV5-51	IGHV4-61	IGHV4-59	IGHV4-39	IGHV4-34	IGHV4-31	IGHV4-28	IGHV4-4
GOBP_B_CELL_RECEPTOR_SIGNALING_PATHWAY	IGLL5	IGHV2-70D	IGHV1-69D	IGHV3-64D	VAV3	SH2B2	CD300A	FCRL3	CMTM3	GCSAML	CTLA4	NFAM1	FCGR2B	RFTN1	PLCL2	ABL1	GCSAM	PTPN22	STAP1	FOXP1	IGHV7-81	IGHV6-1	IGHV5-10-1	IGHV5-51	IGHV4-61	IGHV4-59	IGHV4-39	IGHV4-34	IGHV4-31	IGHV4-28	IGHV4-4	IGHV3-74	IGHV3-73	IGHV3-72	IGHV3-66	IGHV3-64	IGHV3-53	IGHV3-49	IGHV3-48	IGHV3-43	IGHV3-38	IGHV3-35	IGHV3-33	IGHV3-30	IGHV3-23	IGHV3-21	IGHV3-20	IGHV3-16	IGHV3-15
GOBP_CHROMATIN_REMODELING_AT_CENTROMERE	OIP5	ITGB3BP	CENPW	CENPP	NASP	MIS18A	HJURP
GOBP_COMPLEMENT_ACTIVATION_LECTIN_PATHWAY	COLEC10	MASP2	A2M	FCN1	FCN2	KRT1	MBL2	MFAP4	MASP1	SERPING1	COLEC11	FCN3
GOBP_COTRANSLATIONAL_PROTEIN_TARGETING_TO_MEMBRANE	SNAP25-AS1	BHLHE40-AS1	TTC9-DT	GJD2-DT	ENSG00000283175	SEC61B	SEC63	ZFAND2B	TRAM1L1	ARL6IP1	TRAM1	SEC61A1	RN7SL2	RN7SL3	SEC61A2	SRPRB	RN7SL1	SIL1	SRP9	SRP14	SRP19	SRP54	SRP68	SRP72	SRPRA	SSR1	SSR2	SSR3	SEC62	TRAM2
GOBP_HUMORAL_IMMUNE_RESPONSE_MEDIATED_BY_CIRCULATING_IMMUNOGLOBULIN	IGLL5	IGHV2-70D	IGHV1-69D	IGHV3-64D	MASP2	CSMD3	CLU	CR1	CR1L	CR2	CD55	FCER2	FCGR2B	FOXJ1	IGHV7-81	IGHV6-1	IGHV5-10-1	IGHV5-51	IGHV4-61	IGHV4-59	IGHV4-39	IGHV4-34	IGHV4-31	IGHV4-28	IGHV4-4	IGHV3-74	IGHV3-73	IGHV3-72	IGHV3-66	IGHV3-64	IGHV3-53	IGHV3-49	IGHV3-48	IGHV3-43	IGHV3-38	IGHV3-35	IGHV3-33	IGHV3-30	IGHV3-23	IGHV3-21	IGHV3-20	IGHV3-16	IGHV3-15	IGHV3-13	IGHV3-11	IGHV3-7	IGHV2-70	IGHV2-26	IGHV2-5
GOBP_IMMUNE_RESPONSE_REGULATING_SIGNALING_PATHWAY	ADA	MIR708	BTNL10	KIR2DS2	CD24	IGLL5	KLRC4-KLRK1	NR1H3	FLOT1	IGHV2-70D	IGHV1-69D	IGHV3-64D	LILRB2	TNIP1	TLR6	BTN3A3	BTN2A2	NOD1	VAV3	COLEC10	SH2B2	RBCK1	KHDRBS1	CD226	LILRB1	MALT1	BTNL3	LILRB4	LILRA2	BTN3A2	BTN3A1	BTN2A1	CD160	HHLA2	IRAK3	CD300A	PHB2	NLRP3	TIRAP	ERMAP	FCRL3	PIK3AP1	SLC15A4	SPPL3	CCR7	CMTM3	CMKLR1	REG3G	CD200R1
GOBP_INFLAMMATORY_RESPONSE_TO_WOUNDING	F2R	ALOX5	GRN	GIT1	HIF1A	HMOX1	IL1A	MIR17	MIR21	MDK	PPARG	TGFB1	TIMP1	TLR4	CCR2	WDR83	SIGLEC10
GOBP_INTERFERON_GAMMA_MEDIATED_SIGNALING_PATHWAY	NR1H3	CDC37	OTOP1	HCK	HPX	IRGM	IFNG	IFNGR1	IFNGR2	IRF1	JAK1	JAK2	ARG1	PARP14	PPARG	MED1	PTPN2	SP100	STAT1	TP53	TXK	NR1H2	PARP9	NLRC5	SOCS1	NMI
GOBP_LYMPHOCYTE_MEDIATED_IMMUNITY	C17orf99	PARP3	IGLL5	KLRF2	MICA	KLRC4-KLRK1	RASGRP1	CD96	IGHV2-70D	IGHV1-69D	IGHV3-64D	TCIRG1	TUBB4B	BTN3A3	MAD2L2	BATF	CEBPG	CD226	MASP2	CTSC	TRAF3IP2	LILRB1	ARID5A	MALT1	LILRB4	RIPK3	BTN3A2	CD160	CORO1A	SHLD3	TREX1	LYST	NLRP3	CSMD3	SLAMF6	CLNK	SH2D1B	CLC	EXOSC6	CLU	SLC15A4	CCR6	RNF19B	RAET1E	CR1	CR1L	CR2	CRK	CSF2RB
GOBP_MATURATION_OF_5_8S_RRNA_FROM_TRICISTRONIC_RRNA_TRANSCRIPT_SSU_RRNA_5_8S_RRNA_LSU_RRNA	RCL1	RPP40	ERI2	EXOSC8	FTSJ3	NOP9	EXOSC7	RRS1	BOP1	EXOSC2	PES1	UTP20	ABT1	EXOSC3	FCF1	EXOSC9	EXOSC10	WDR12	RPS21	KRI1	ERI3	NOL9	NOP14	ERI1	URB1
GOBP_MRNA_3_END_PROCESSING_BY_STEM_LOOP_BINDING_AND_CLEAVAGE	LSM11	ZNF473	CPSF3	CPSF2	SLBP	LSM10
GOBP_NATURAL_KILLER_CELL_ACTIVATION_INVOLVED_IN_IMMUNE_RESPONSE	KLRF2	CORO1A	PGLYRP2	PGLYRP3	AP1G1	UNC13D	FCGR3A	ZNF683	HLA-F	IFNE	IFNA1	IFNA2	IFNA4	IFNA5	IFNA6	IFNA7	IFNA8	IFNA10	IFNA13	IFNA14	IFNA16	IFNA17	IFNA21	IFNB1	IFNW1	IL12B	KLRC2	LAMP1	NKG7	CD244	IFNK	RAB27A	VAMP2	VAMP7	PGLYRP1
GOBP_NCRNA_PROCESSING	METTL15P1	DPH3P1	CT45A7	RCL1	MPHOSPH10	MPHOSPH6	POP7	ZMPSTE24	CT45A10	CT45A9	CT45A8	ENSG00000275464	ADAR	NPM3	NSA2	EMG1	C1D	DDX17	NOP56	RPP30	RPP38	TBL3	FARS2	POP4	WDR4	RPP40	UTP14A	WDR3	POP1	EBNA1BP2	CLP1	DDX52	DUS4L	RPP14	KRR1	PWP1	LSM6	WDR6	RPL35	ERI2	TP53RK	KTI12	RPUSD1	ADAT3	EXOSC8	HELQ	HENMT1	TOE1	BUD23
GOBP_NEGATIVE_REGULATION_OF_ALPHA_BETA_T_CELL_PROLIFERATION	LGALS9B	CD274	CLEC4G	ARG2	LGALS9	FOXP3	ZBTB7B	TWSG1	XCL1	VSIR	LGALS7B	LGALS9C	NDFIP1	ITCH	CBLB	TNFRSF14
GOBP_NEGATIVE_REGULATION_OF_B_CELL_ACTIVATION	PARP3	CD300A	CR1	RC3H1	CTLA4	FCGR2B	FOXJ1	TNFRSF13B	TNFRSF21	HMGB3	ID2	IL10	INHA	INHBA	INPP5D	TBC1D10C	LYN	MIR185	MNDA	ATM	PAWR	FOXP3	BANK1	PKN1	PTEN	BCL6	BLK	SAMSN1	SFRP1	BTK	TNFAIP3	TYROBP	LAPTM5	NDFIP1	CASP3	THOC1
GOBP_NEGATIVE_REGULATION_OF_LEUKOCYTE_MEDIATED_IMMUNITY	PARP3	MICA	CD96	LILRB1	LILRB4	CD300A	CSMD3	CR1	CR1L	CR2	CRK	CX3CR1	CD55	AHR	FCGR2B	FOXF1	FOXJ1	IL4I1	GFER	RABGEF1	TBX21	NCKAP1L	HFE	HLA-A	HLA-B	HLA-E	HLA-F	HLA-G	HMOX1	CLEC4G	IFNA2	IFNB1	IL7R	IL13RA2	JAK3	KIR2DL4	KLRC1	KLRD1	ARG1	CLEC12B	LGALS9	ARRB2	SMAD7	CD46	FOXP3	SERPINB9	IL20RB	SUSD4	PPP3CB
GOBP_NEGATIVE_REGULATION_OF_LYMPHOCYTE_MEDIATED_IMMUNITY	PARP3	MICA	CD96	LILRB1	LILRB4	CSMD3	CR1	CR1L	CR2	CRK	CD55	AHR	FCGR2B	FOXJ1	IL4I1	GFER	TBX21	NCKAP1L	HFE	HLA-A	HLA-B	HLA-E	HLA-F	HLA-G	CLEC4G	IFNA2	IFNB1	IL7R	KIR2DL4	KLRC1	KLRD1	ARG1	CLEC12B	LGALS9	ARRB2	SMAD7	CD46	FOXP3	SERPINB9	IL20RB	SUSD4	PPP3CB	DUSP22	PTPN6	PTPRC	BCL6	SERPINB4	CEACAM1	XCL1
GOBP_NEGATIVE_REGULATION_OF_T_CELL_MEDIATED_IMMUNITY	LILRB1	LILRB4	AHR	FCGR2B	IL4I1	TBX21	NCKAP1L	HFE	HLA-F	HLA-G	CLEC4G	IFNA2	IFNB1	IL7R	KLRC1	KLRD1	ARG1	SMAD7	FOXP3	IL20RB	PPP3CB	DUSP22	PTPRC	CEACAM1	XCL1	NOD2	SLAMF1
GOBP_NEGATIVE_T_CELL_SELECTION	CCR7	DOCK2	GLI3	AIRE	THEMIS	PTPRC	SHH	ZAP70	CD3E	CD28	ATG5	CD74
GOBP_NUCLEAR_TRANSCRIBED_MRNA_CATABOLIC_PROCESS_NONSENSE_MEDIATED_DECAY	RNPS1	PNLDC1	DCP2	DCP1B	ETF1	CASC3	NCBP2	SMG1	SMG6	SMG5	GSPT2	UPF2	PABPC1	GSPT1	A1CF	HNRNPAB	APOBEC1	EIF3E	MAGOH	NCBP1	PARN	NBAS	EXOSC10	MAGOHB	SMG8	PNRC2	DCP1A	SMG9	UPF1	SKIV2L	UPF3B	UPF3A	SECISBP2	PYM1	HELZ2	DHX34	EIF4A3	CTIF	SMG7	RBM8A
GOBP_NUCLEOSOME_ASSEMBLY	TSPY10	CHAF1A	ANP32B	BAZ1A	SUPT16H	H2BK1	H4-16	H3C14	H2BU1	TSPY26P	H1-8	SPTY2D1	H2BW1	DAXX	DNAJC9	TSPYL4	KAT6B	PADI4	H2BC1	SHPRH	ASF1A	NAP1L5	H2BW2	H1-0	H1-2	H1-3	H1-4	H1-5	H1-6	H2AX	H2BC5	H2BC3	H3-3A	H3-3B	H1-1	HMGB2	H3C15	H2BC19P	H1-9P	TSPYL6	MCM2	H2BC18	NAP1L1	NAP1L2	NAP1L3	NAP1L4	H2AB2	H2AB1	NPM1
GOBP_PHAGOCYTOSIS_RECOGNITION	IGLL5	IGHV2-70D	IGHV1-69D	IGHV3-64D	SPON2	COLEC10	CRP	FCGR1A	FCN1	FCN2	JMJD6	IGHV7-81	IGHV6-1	IGHV5-10-1	IGHV5-51	IGHV4-61	IGHV4-59	IGHV4-39	IGHV4-34	IGHV4-31	IGHV4-28	IGHV4-4	IGHV3-74	IGHV3-73	IGHV3-72	IGHV3-66	IGHV3-64	IGHV3-53	IGHV3-49	IGHV3-48	IGHV3-43	IGHV3-38	IGHV3-35	IGHV3-33	IGHV3-30	IGHV3-23	IGHV3-21	IGHV3-20	IGHV3-16	IGHV3-15	IGHV3-13	IGHV3-11	IGHV3-7	IGHV2-70	IGHV2-26	IGHV2-5	IGHV1-69-2	IGHV1-69	IGHV1-58
GOBP_POSITIVE_REGULATION_OF_B_CELL_ACTIVATION	ADA	IGLL5	CDKN1A	IGHV2-70D	IGHV1-69D	IGHV3-64D	VAV3	MAD2L2	TNFSF13B	SHLD3	CHRNB2	TIRAP	FCRL3	TNFRSF13C	EXOSC6	TICAM1	SHLD1	GPR183	EPHB2	PAXIP1	CLCF1	IGHV7-81	IGHV6-1	IGHV5-10-1	IGHV5-51	IGHV4-61	IGHV4-59	IGHV4-39	IGHV4-34	IGHV4-31	IGHV4-28	IGHV4-4	IGHV3-74	IGHV3-73	IGHV3-72	IGHV3-66	IGHV3-64	IGHV3-53	IGHV3-49	IGHV3-48	IGHV3-43	IGHV3-38	IGHV3-35	IGHV3-33	IGHV3-30	IGHV3-23	IGHV3-21	IGHV3-20	IGHV3-16
GOBP_POSITIVE_REGULATION_OF_INTERLEUKIN_4_PRODUCTION	CEBPB	NLRP3	CLECL1	FCER1G	GATA3	HLA-E	IL1RAP	IRF4	LGALS9	FOXP3	IL20RB	SASH3	PRG2	PRKCQ	PRKCZ	RARA	SYK	TNFSF4	ZP3	SLC7A5	EPX	HAVCR2	IL33	CD3E	CD28	CD86	CD40LG
GOBP_POSITIVE_REGULATION_OF_TUMOR_NECROSIS_FACTOR_SUPERFAMILY_CYTOKINE_PRODUCTION	ADAM8	RASGRP1	NOD1	SPON2	ARFGEF2	ARID5A	LILRA2	IL17F	TMEM106A	TIRAP	C1QTNF4	CLU	LRRK2	TICAM1	CYBA	CYBB	DDT	DHX9	AGER	EPHB2	FCGR3A	DDX58	LY96	ZBTB20	PYCARD	HDAC2	HLA-E	HMGB1	HSPB1	IFNG	IFNGR1	APP	LILRA5	IL1A	IL6	IL12B	IL17A	ISL1	JAK2	LBP	LEP	LGALS9	LPL	MIR144	MIR206	MIR27B	MIF	MMP8	MYD88
GOBP_POSITIVE_T_CELL_SELECTION	BATF	SLAMF6	IL23R	CTSL	ZFPM1	DOCK2	MTOR	TBX21	IL6	IL6R	IL12B	IL12RB1	IRF4	ITPKB	THEMIS	LY9	FOXP3	IL23A	PTPN2	PTPRC	BCL2	SHH	BCL11B	SPN	SRF	BRAF	STAT3	STAT6	STK11	ZAP70	FOXN1	LOXL3	TNFSF18	CD3D	CD3E	CD3G	CD74	TOX
GOBP_REGULATION_OF_ANTIGEN_RECEPTOR_MEDIATED_SIGNALING_PATHWAY	ADA	BTN2A2	CD226	MALT1	LILRB4	CD160	CD300A	FCRL3	CCR7	CMTM3	GCSAML	RC3H1	NFAM1	DUSP3	ELF1	FCGR2B	PLCL2	GCSAM	PRKD2	PTPN22	STAP1	GBP1	FOXP1	GPS2	PHPT1	KCNN4	LCK	LGALS3	LYN	SH2D1A	MIR18A	MIR19A	MIR34A	PAWR	TRAT1	UBASH3A	PRKCB	PRKCH	PRNP	DUSP22	SLC39A10	PTPN2	PTPN6	PTPRC	PTPRJ	NECTIN2	RELA	RPS3	CEACAM1
GOBP_REGULATION_OF_COMPLEMENT_ACTIVATION	VSIG4	PHB2	CSMD3	CR1	CR1L	CR2	CD55	A2M	CFH	IL1B	CD46	PHB1	TREM2	SUSD4	MIR520E	MIR520B	C1QBP	SERPING1	C3	C4BPA	C4BPB	CD5L	CD59
GOBP_REGULATION_OF_HUMORAL_IMMUNE_RESPONSE	CXCL13	SPINK5	IL17F	VSIG4	PHB2	CSMD3	CCR7	SPNS2	CR1	CR1L	CR2	CD55	A2M	FCER2	FCGR2B	FOXJ1	KLK5	GATA6	CFH	HPX	KLK3	IL1B	IL17A	LTA	CD46	PGC	PHB1	TREM2	PPP2R3C	SUSD4	KLK7	MIR520E	MIR520B	PTPN6	ZP4	PTPRC	NOD2	C1QBP	SERPING1	TNF	C3	C4BPA	C4BPB	ACOD1	ZP3	CD5L	CD59
GOBP_REGULATION_OF_NATURAL_KILLER_CELL_MEDIATED_IMMUNITY	MICA	KLRC4-KLRK1	RASGRP1	CD96	CD226	LILRB1	CD160	SLAMF6	CLNK	SH2D1B	RAET1E	CRK	PIK3R6	AP1G1	KLRK1	CADM1	NCR3	GFER	HLA-A	HLA-B	HLA-E	HLA-F	HLA-G	RAET1G	IL12A	IL12B	KIR2DL4	KLRB1	KLRC1	KLRC2	KLRC3	KLRD1	CLEC12B	LAG3	LAMP1	LEP	LGALS9	SH2D1A	ARRB2	SERPINB9	CRTAM	PVR	NECTIN2	IL21	SERPINB4	CEACAM1	STAT5B	VAV1	KLRC4
GOBP_RESPONSE_TO_TYPE_I_INTERFERON	TANK	ADAR	IFITM3	IFITM2	CDC37	USP18	TREX1	TRIM6	DCST1	TTLL12	YTHDF3	SAMHD1	LSM14A	SETD2	TBK1	CNOT7	UBE2K	IFNE	STING1	IFI27	IFIT1	IFNA1	IFNA2	IFNA4	IFNA5	IFNA6	IFNA7	IFNA8	IFNA10	IFNA13	IFNA14	IFNA16	IFNA17	IFNA21	IFNAR1	IFNAR2	IFNB1	IFNW1	IRAK1	IRF3	IRF7	JAK1	USP27X	MIR21	MMP12	IFIT1B	MX1	MYD88	OAS1
GOBP_RIBOSOME_BIOGENESIS	METTL15P1	RCL1	MPHOSPH10	MPHOSPH6	POP7	ENSG00000275464	NPM3	NSA2	EMG1	C1D	MYBBP1A	DDX17	NOP56	RPP30	RPP38	TBL3	POP4	RPP40	UTP14A	WDR3	EBNA1BP2	DDX52	KRR1	PWP1	LSM6	RPL35	ERI2	RPUSD1	EXOSC8	HELQ	BUD23	MALSU1	TSR3	FTSJ3	EXOSC6	PIH1D2	MTERF4	NUDT16	WDR36	RPL10L	SRFBP1	NSUN5P1	NOP9	DDX3X	DDX10	SPATA5	DKC1	METTL15	ERCC2
GOBP_RRNA_METABOLIC_PROCESS	METTL15P1	RCL1	MPHOSPH10	MPHOSPH6	POP7	ENSG00000275464	NPM3	NSA2	EMG1	C1D	DDX17	NOP56	RPP30	RPP38	ERN2	TBL3	POP4	RPP40	UTP14A	POLR1G	WDR3	SPIN1	EBNA1BP2	DDX52	KRR1	PWP1	LSM6	RPL35	ERI2	GTF3C6	RPUSD1	EXOSC8	HELQ	BUD23	DIS3L	TSR3	FTSJ3	EXOSC6	PIH1D2	MTERF4	NUDT16	WDR36	SLFN13	SRFBP1	NSUN5P1	NOP9	DEDD2	DDX10	DDX11
GOBP_T_CELL_SELECTION	BATF	SLAMF6	CCR7	IL23R	CTSL	ZFPM1	DOCK2	MTOR	GATA3	GLI3	TBX21	AIRE	IL6	IL6R	IL12B	IL12RB1	IL15	IRF4	ITPKB	JAG2	RHOA	THEMIS	LY9	FOXP3	IL23A	PTPN2	PTPRC	BCL2	SHH	BCL11B	SPN	SRF	BRAF	STAT3	STAT6	STK11	SYK	ZAP70	CARD11	FOXN1	LOXL3	TNFSF18	CD1D	CD3D	CD3E	CD3G	CD4	CD28	ATG5
GOBP_VIRAL_GENE_EXPRESSION	TRIM13	CDK9	IFITM3	ST6GALNAC2	HEXIM1	MID2	CHD1	TRIM31	MAN1B1	MGAT4B	MGAT4A	CSNK1A1	DHX9	EIF2D	EP300	MON1B	SNW1	TRIM32	RRP1B	TARDBP	FUT8	ST6GALNAC3	POU2F3	MGAT4C	GALNT1	ST6GALNAC4	SPCS1	MCTS1	GSK3A	GSK3B	GTF2B	MDFIC	HDAC1	HPN	PRMT1	JUN	MAN2A1	MGAT1	MGAT2	MGAT5	EIF2AK4	FURIN	PCBP2	LEF1	ZNF639	EIF3L	LARP7	INPP5K	RSF1
[truncated: 451 more columns]
