# Supplementary figures and images for: ACAP1 Deficiency Predicts Inferior Immunotherapy Response in Solid Tumors
Source: MDPI journal article supplement (doi:10.3390/cancers14235951), 2022-12-01

Figure 1D

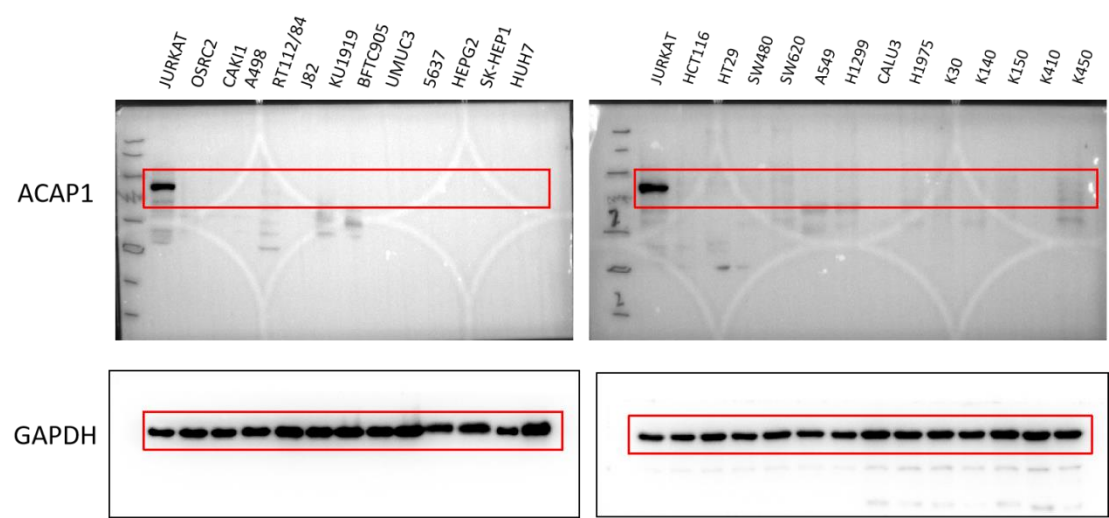

Figure 6G

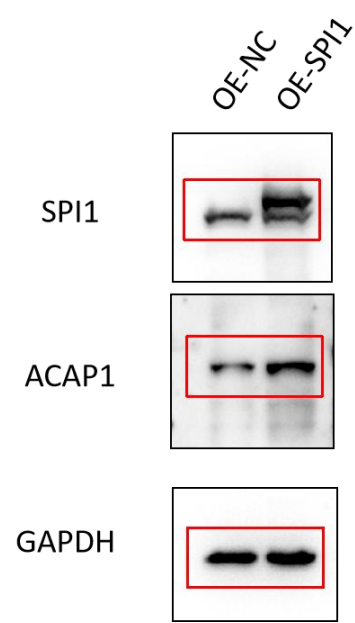

**Figure 6H**

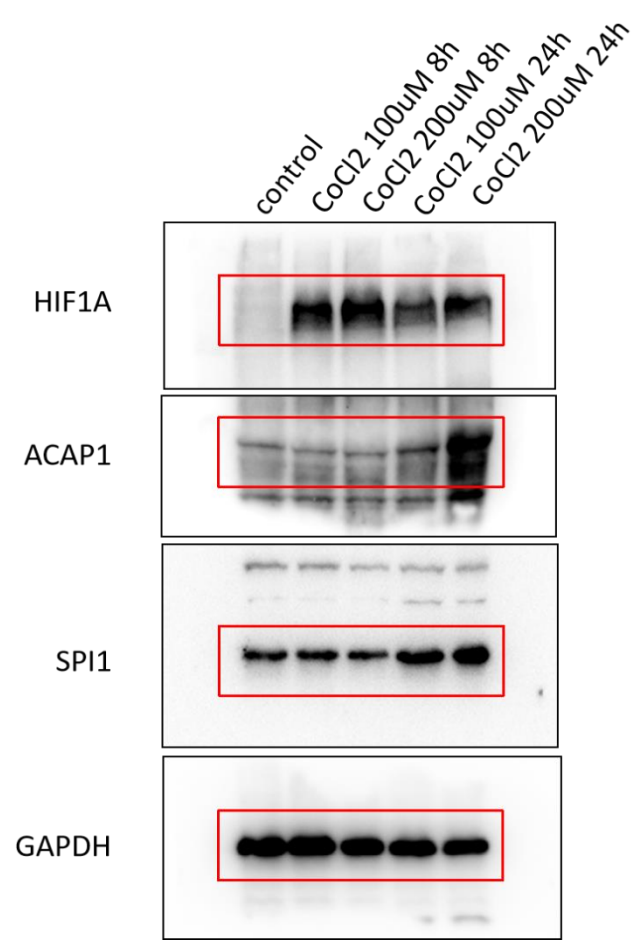

**Figure 8A**

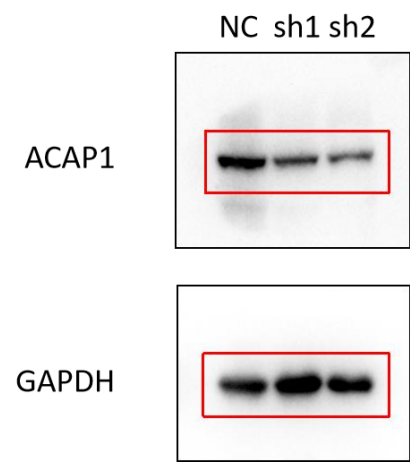

Supplement: s1 [file s1]
